# Supplementary material for: Whole-genome sequencing and comprehensive variant analysis of a Japanese individual using massively parallel sequencing
Source: Springer Nature journal article supplement (doi:10.1038/ng.691), 2010-10-24
Supplement: 41588_2010_BFng691_MOESM18_ESM.pdf [file 41588_2010_BFng691_MOESM18_ESM.pdf]

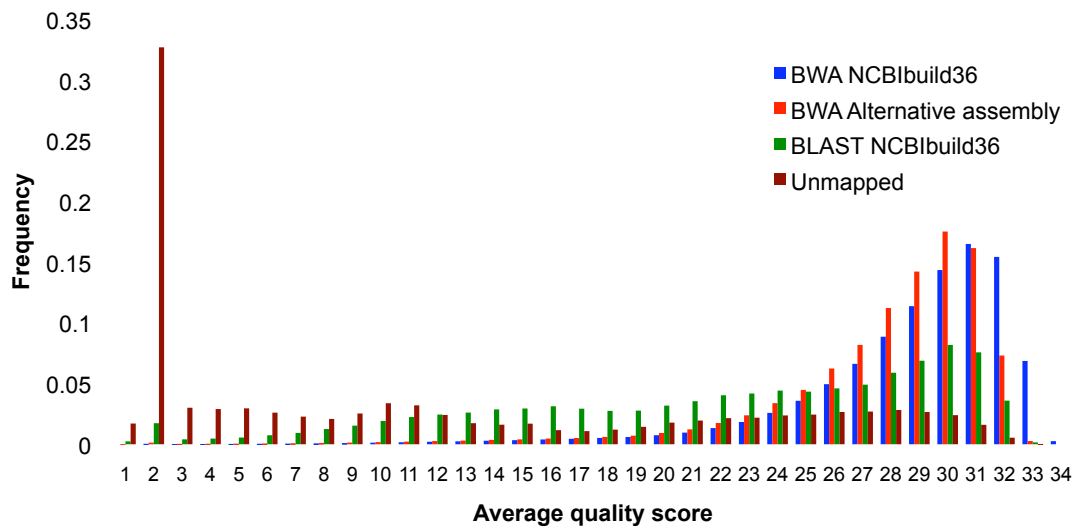

Supplementary Figure 1. **Distribution of quality score.** BWA NCBIbuild36; average quality score of the reads that were mapped to NCBI build 36. BWA Alternative assembly; average quality score of the reads that were mapped to alternative assembly. BLAST NCBIbuild36; average quality score of the reads that were mapped to NCBI build 36. Unmapped; average quality score of the unmapped reads.

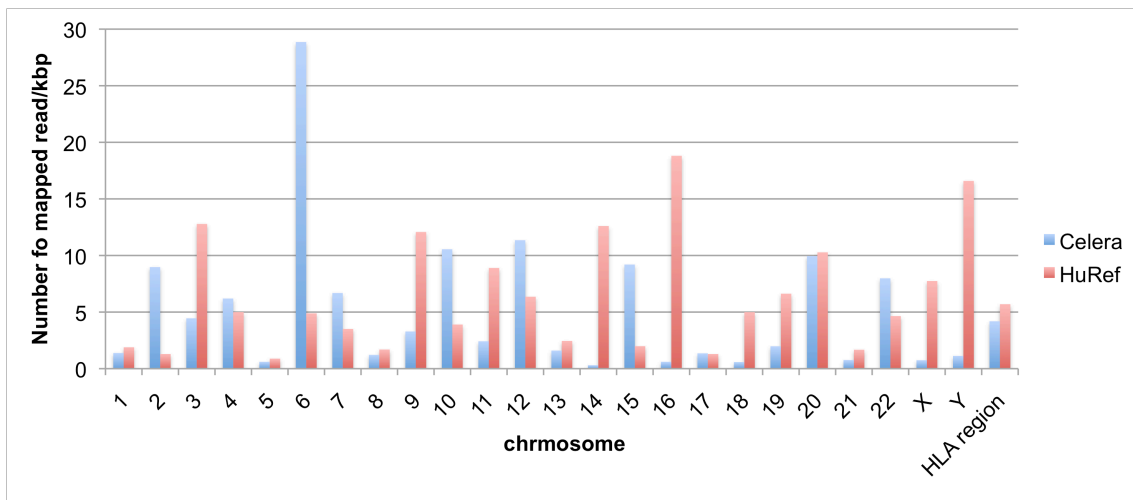

Supplementary Figure 2. **Number of mapped reads to alternative assemblies.** The numbers of mapped reads per kbp are shown.

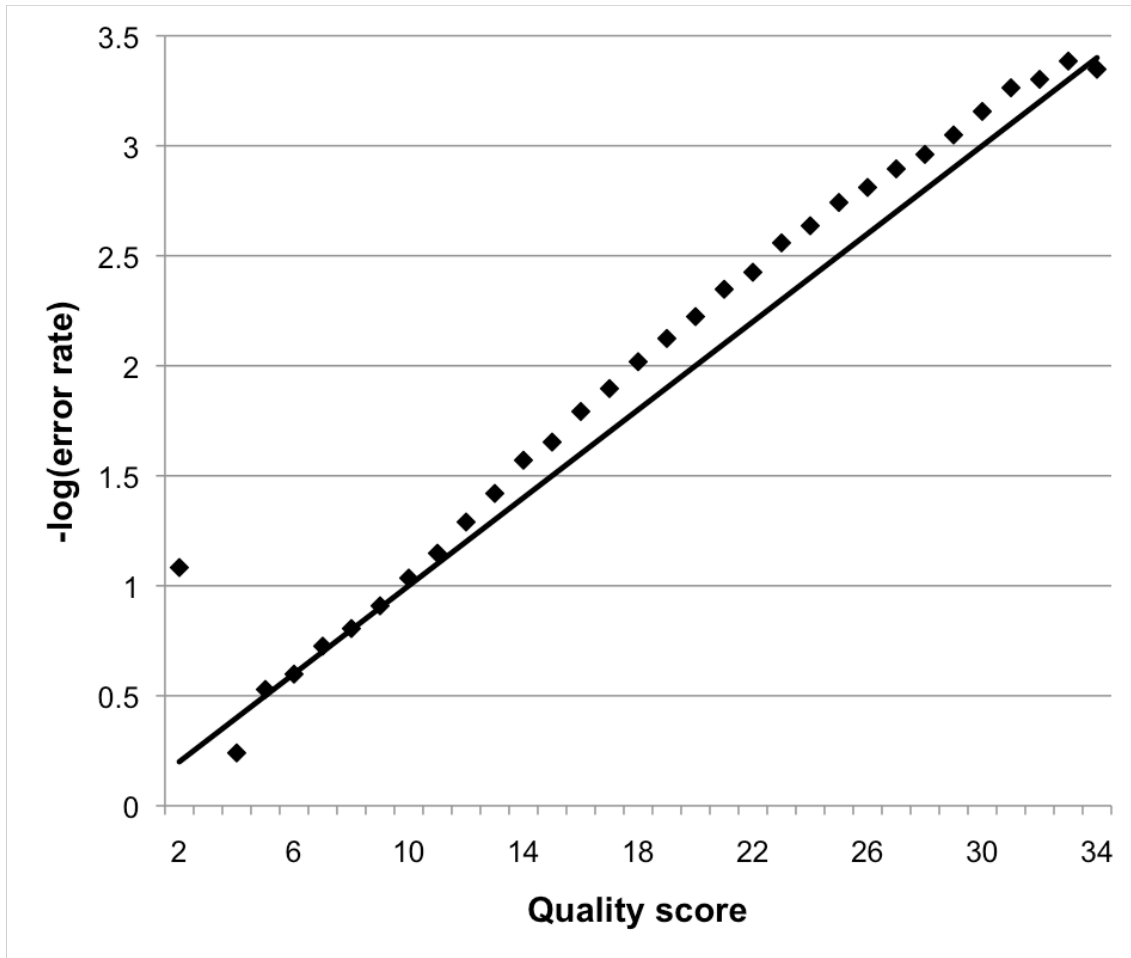

Supplementary Figure 3. **Correlation between observed and expected error rate.** Observed (squares) and expected (line) error rates based on chromosome X and Y are shown. Expected error rates were calculated from sequence quality score.

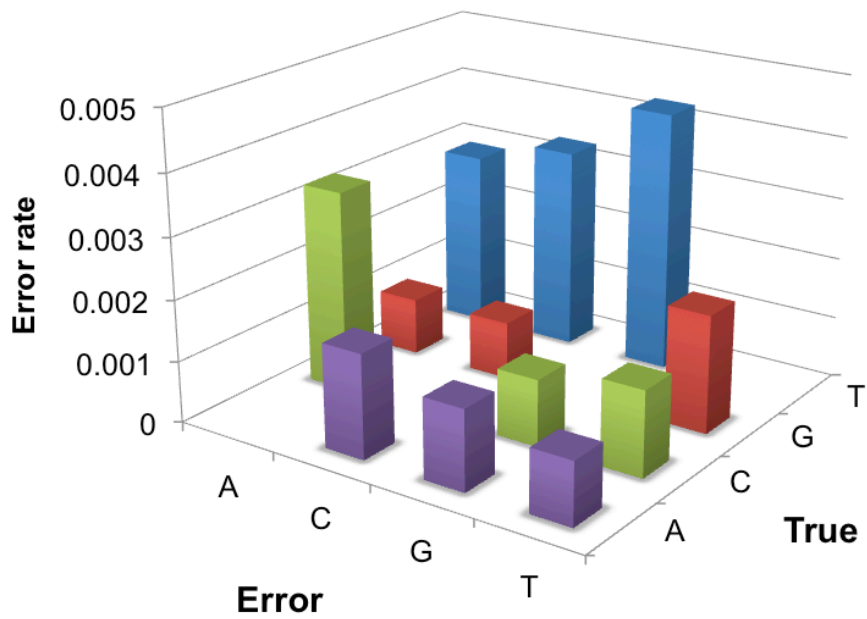

Supplementary Figure 4. **Result of sequencing error rate estimation.** Direction of sequencing errors were estimated from chromosome X and Y.



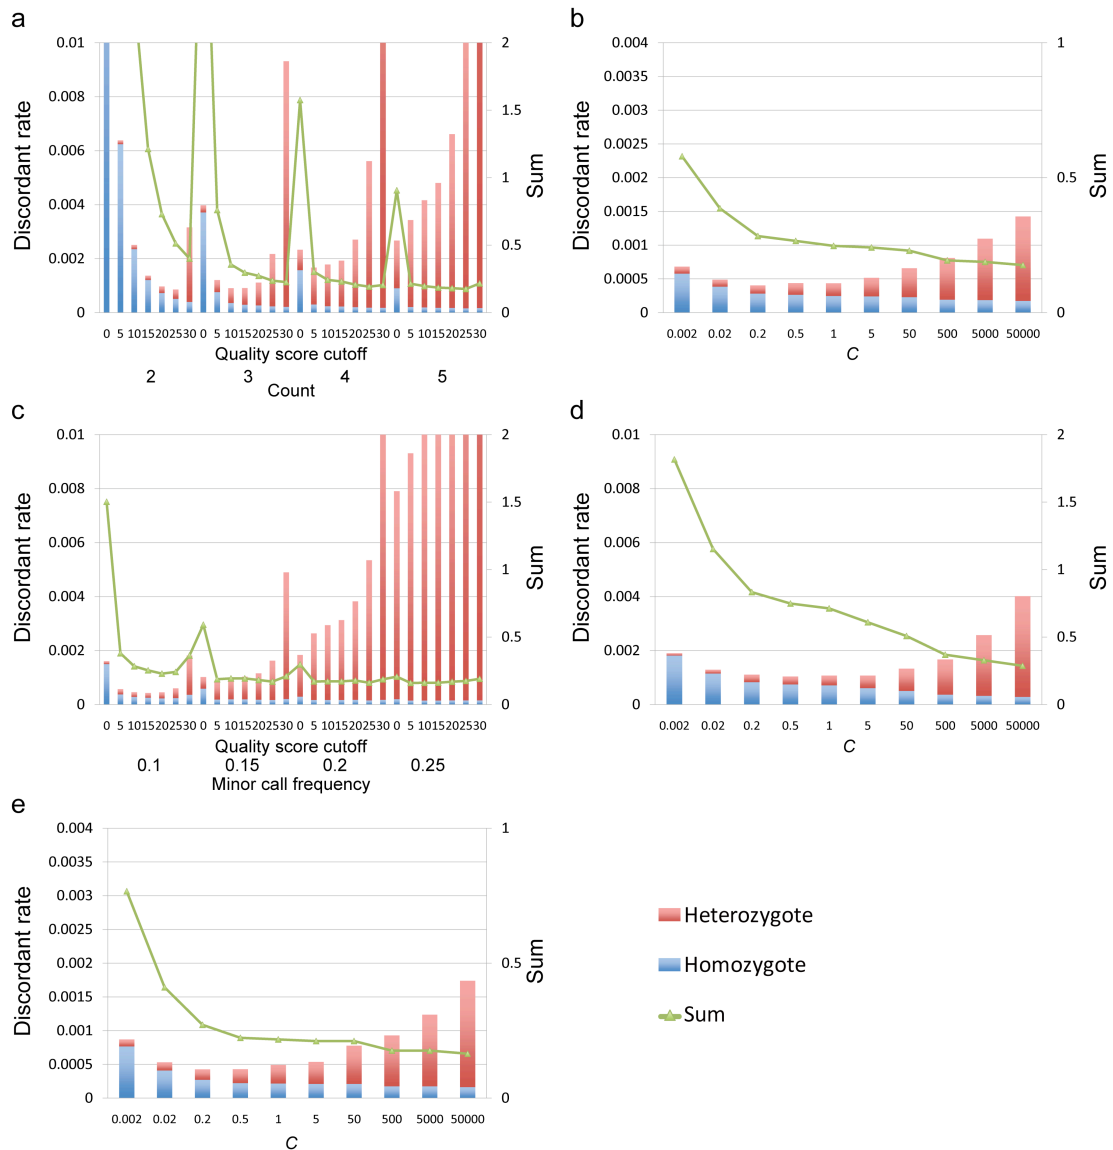

Supplementary Figure 5. **Comparison of SNP calling methods.** No read filtering was performed. **(a)** Counting method. **(b)** Bayesian decision method with quality score correction.  $C$  indicates the Bayesian-decision threshold. **(c)** Frequency method. **(d)** Bayesian decision method with a constant error rate.  $C$  indicates the Bayesian-decision threshold. **(e)** Bayesian decision method with no quality score correction.  $C$  indicates the Bayesian-decision threshold. Red bar; heterozygous discordant rate ( $D_{Ht}$ ), blue bar; homozygous discordant rate ( $D_{Ho}$ ) and green line; sum of both discordant rate ( $\text{Sum} = D_{Ht} + 1000 \cdot D_{Ho}$ ). For counting and frequency method, we discarded calls whose quality score was smaller than a chosen cut-off value (Quality score cutoff).

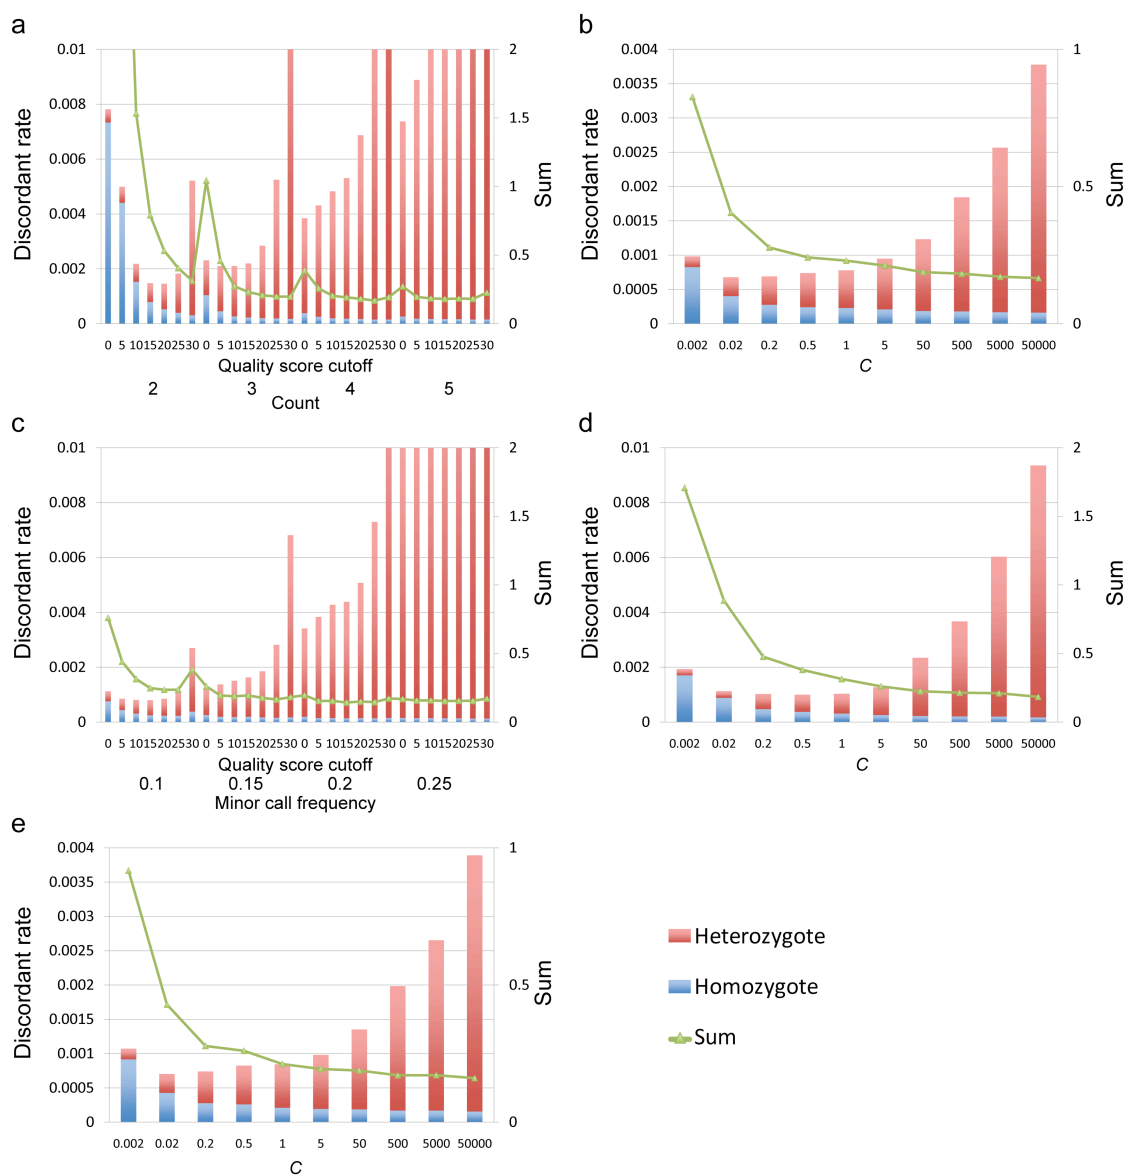

Supplementary Figure 6. **Comparison of SNP calling methods.** Read filtering; average base quality  $\geq 20$  and mapping quality  $\geq 30$ . **(a)** Counting method. **(b)** Bayesian decision method with quality score correction.  $C$  indicates the Bayesian-decision threshold. **(c)** Frequency method. **(d)** Bayesian decision method with a constant error rate.  $C$  indicates the Bayesian-decision threshold. **(e)** Bayesian decision method with no quality score correction.  $C$  indicates the Bayesian-decision threshold. Red bar; heterozygous discordant rate ( $D_{Ht}$ ), blue bar; homozygous discordant rate ( $D_{Ho}$ ) and green line; sum of both discordant rates ( $Sum = D_{Ht} + 1000 * D_{Ho}$ ). For counting and frequency method, we discarded calls whose quality score was smaller than a chosen cut-off value (Quality score cutoff).

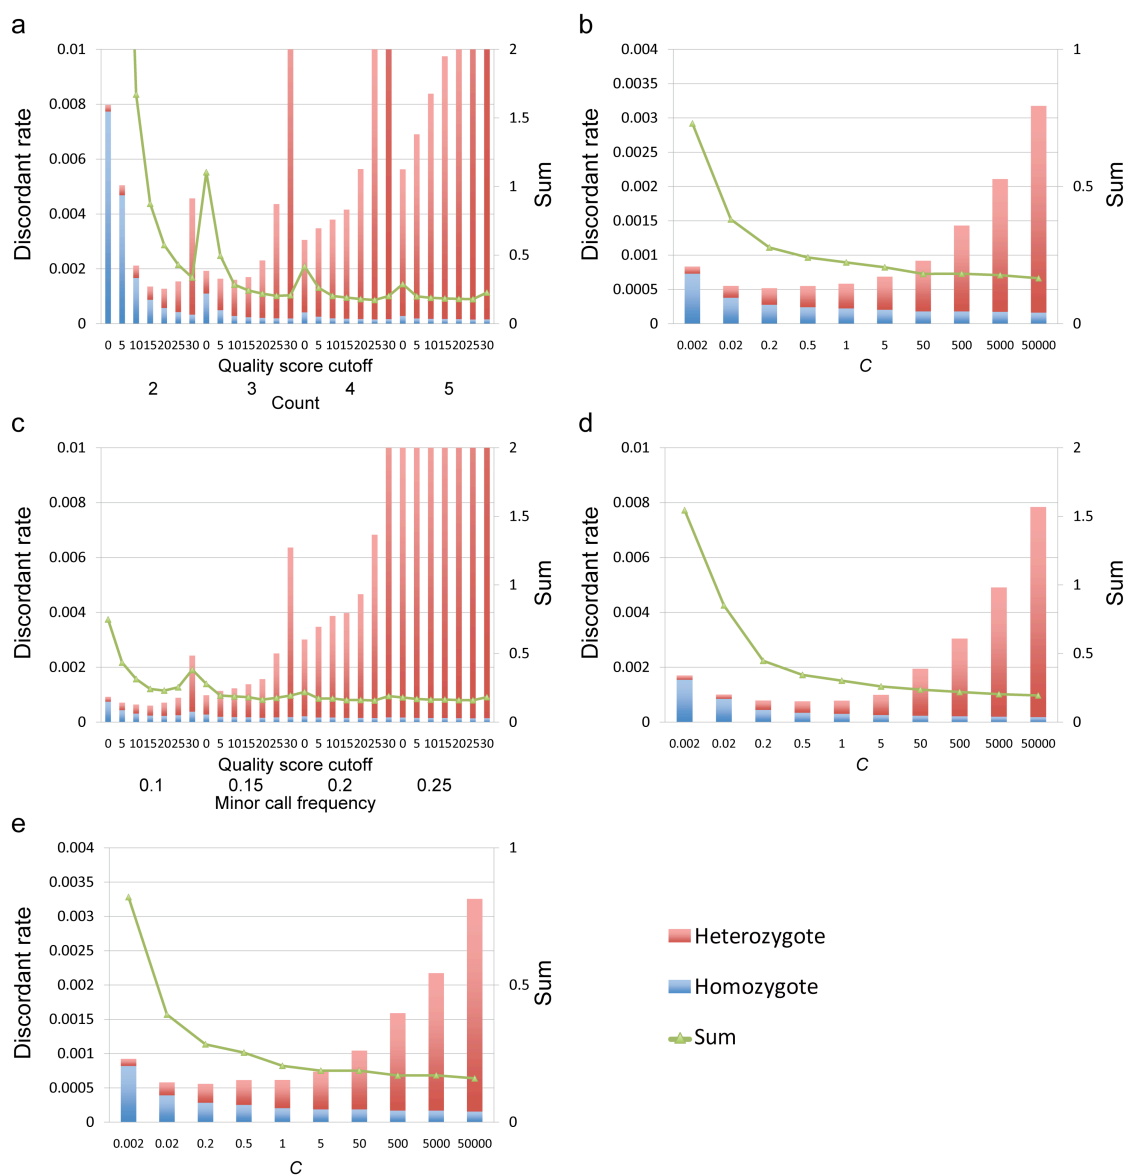

Supplementary Figure 7. **Comparison of SNP calling methods.** Read filtering; average base quality  $\geq 20$  and mapping quality  $\geq 1$ . **(a)** Counting method. **(b)** Bayesian decision method with quality score correction.  $C$  indicates the Bayesian-decision threshold. **(c)** Frequency method. **(d)** Bayesian decision method with a constant error rate.  $C$  indicates the Bayesian-decision threshold. **(e)** Bayesian decision method with no quality score correction.  $C$  indicates the Bayesian-decision threshold. Red bar; heterozygous discordant rate ( $D_{Ht}$ ), blue bar; homozygous discordant rate ( $D_{Ho}$ ) and green line; sum of both discordant rates ( $\text{Sum} = D_{Ht} + 1000 \cdot D_{Ho}$ ). For counting and frequency method, we discarded calls whose quality score was smaller than a chosen cut-off value (Quality score cutoff).

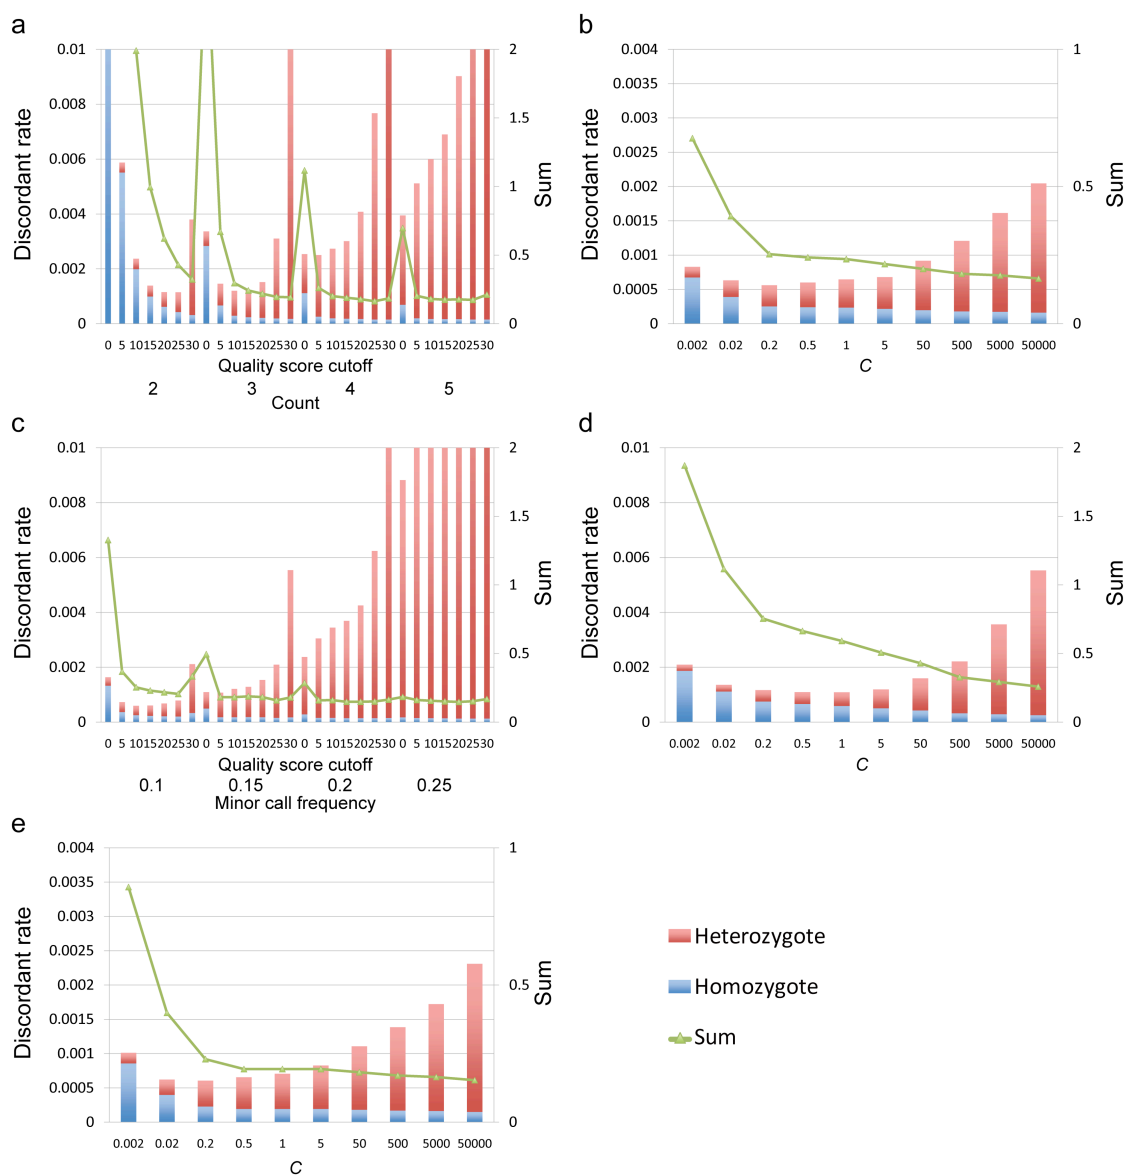

Supplementary Figure 8. **Comparison of SNP calling methods.** Read filtering; average base quality  $\geq 10$  and mapping quality  $\geq 30$ . **(a)** Counting method. **(b)** Bayesian decision method with quality score correction.  $C$  indicates the Bayesian-decision threshold. **(c)** Frequency method. **(d)** Bayesian decision method with a constant error rate.  $C$  indicates the Bayesian-decision threshold. **(e)** Bayesian decision method with no quality score correction.  $C$  indicates the Bayesian-decision threshold. Red bar; heterozygous discordant rate ( $D_{Ht}$ ), blue bar; homozygous discordant rate ( $D_{Ho}$ ) and green line; sum of both discordant rates ( $Sum = D_{Ht} + 1000 * D_{Ho}$ ). For counting and frequency method, we discarded calls whose quality score was smaller than a chosen cut-off value (Quality score cutoff).

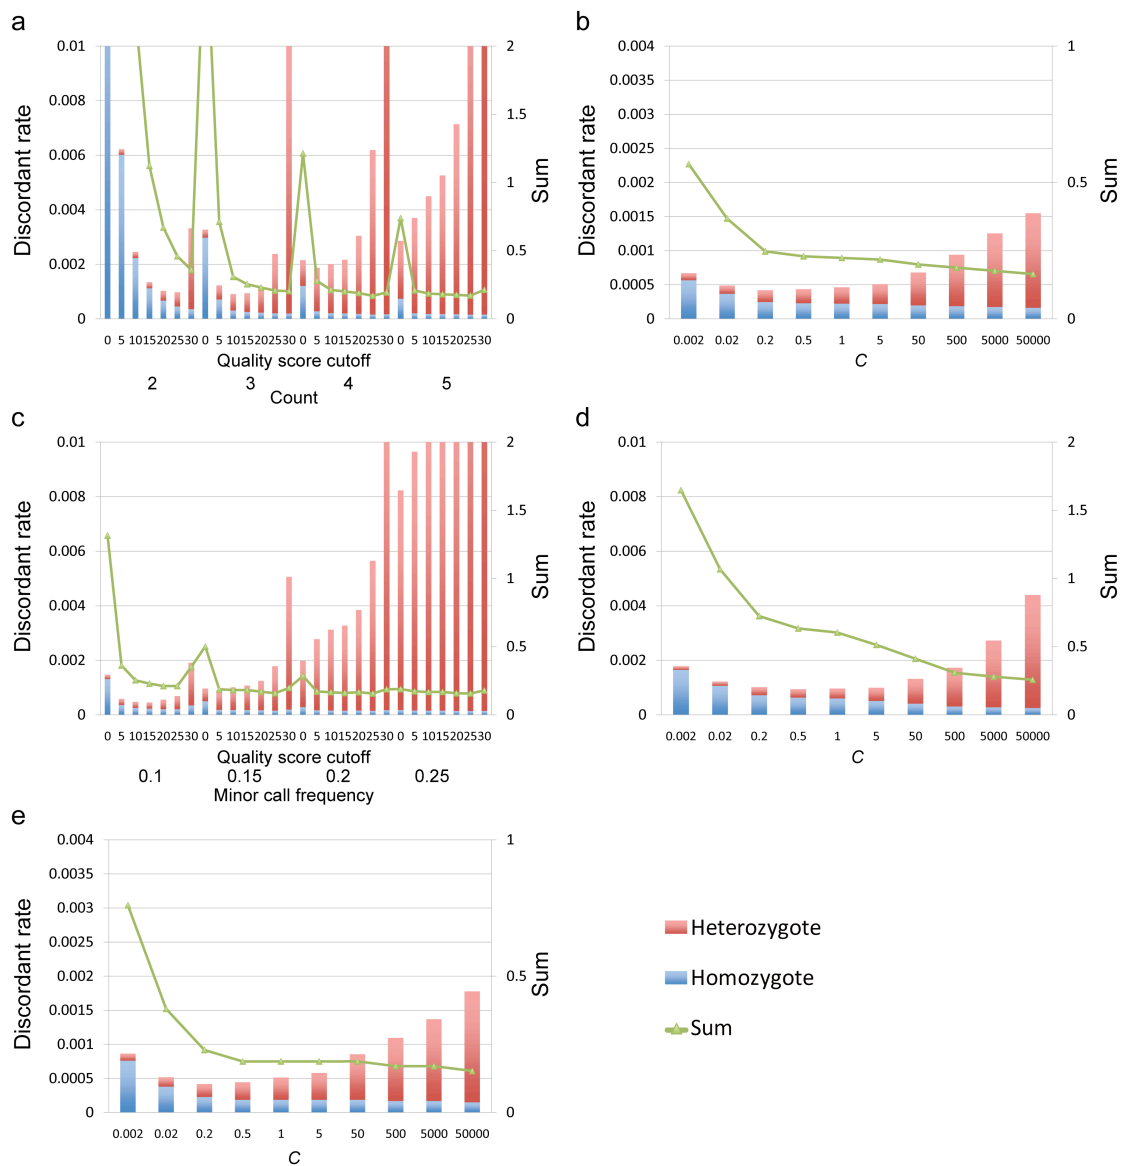

Supplementary Figure 9. **Comparisons of SNP calling methods.** Read filtering; average base quality  $\geq 10$  and mapping quality  $\geq 1$ . **(a)** Counting method. **(b)** Bayesian decision method with quality score correction.  $C$  indicates the Bayesian-decision threshold. **(c)** Frequency method. **(d)** Bayesian decision method with a constant error rate.  $C$  indicates the Bayesian-decision threshold. **(e)** Bayesian decision method with no quality score correction.  $C$  indicates the Bayesian-decision threshold. Red bar; heterozygous discordant rate ( $D_{Ht}$ ), blue bar; homozygous discordant rate ( $D_{Ho}$ ) and green line; sum of both discordant rates ( $\text{Sum} = D_{Ht} + 1000 \cdot D_{Ho}$ ). For counting and frequency method, we discarded calls whose quality score was smaller than a chosen cut-off value (Quality score cutoff).

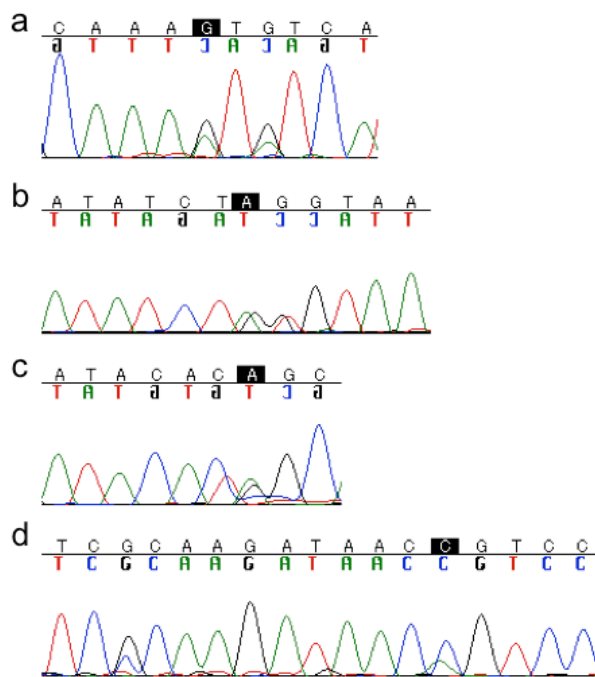

Supplementary Figure 10. **Result of Sanger sequencing near discordant SNPs. (a)** rs3828142. **(b)** rs2661665. **(c)** rs9914156. **(d)** rs4788728. Target SNPs were marked in black.

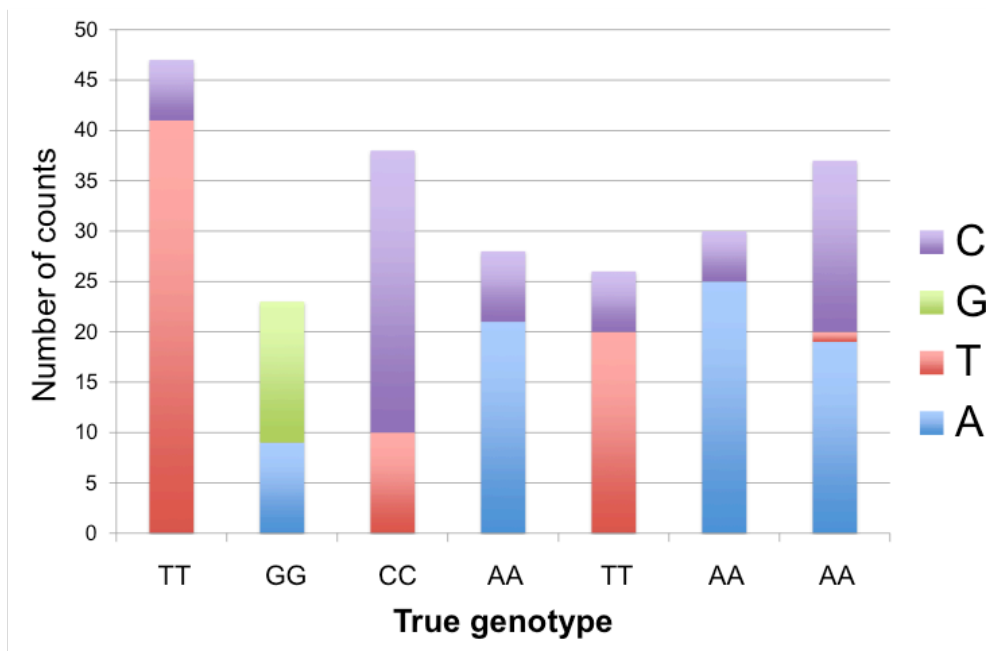

Supplementary Figure 11. **Observed number of calls on false positives of our SNV detection.** True genotype is based on Sanger sequencing method.

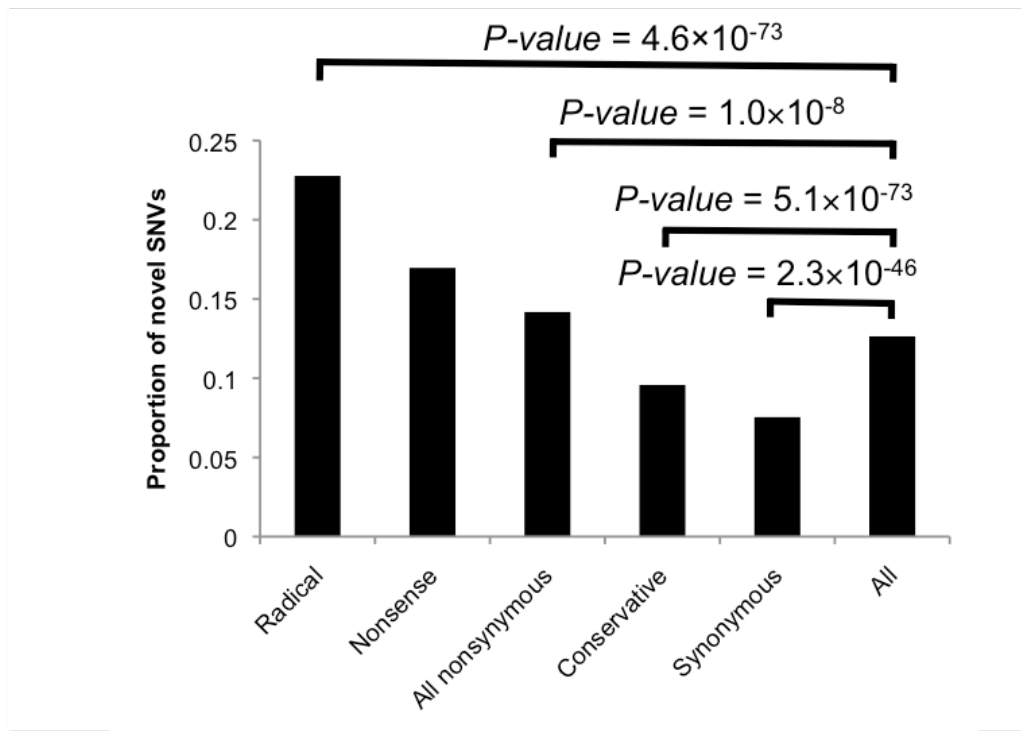

Supplementary Figure 12. **Fraction of novel SNVs in NA18943.** Number of novel and known SNVs (novel/all) were as follows; radical nonsynonymous 772/3,353, nonsense 19/112, all nonsynonymous 1,425/9,783, conservative nonsynonymous 634/6,318, synonymous 797/10,077, and all 395,940/3,132,608.



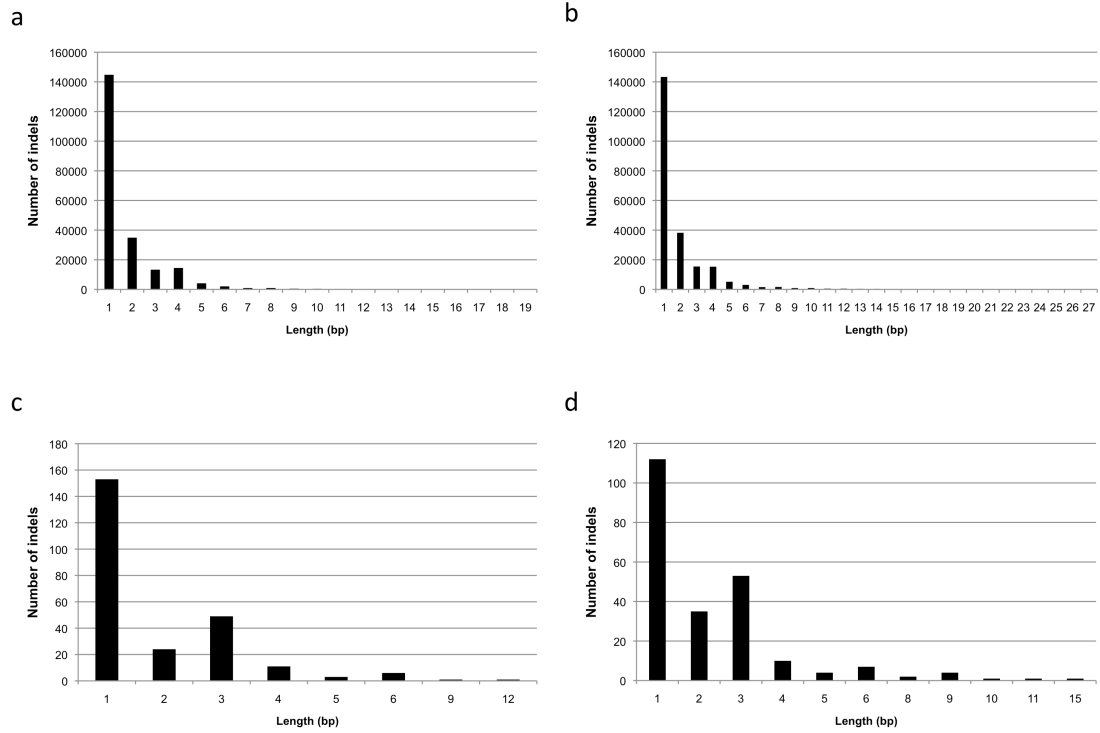

Supplementary Figure 13. **Length distribution of short indels.** (a) Insertions. (b) Deletions. (c) Insertions in coding region. (d) Deletions in coding region.

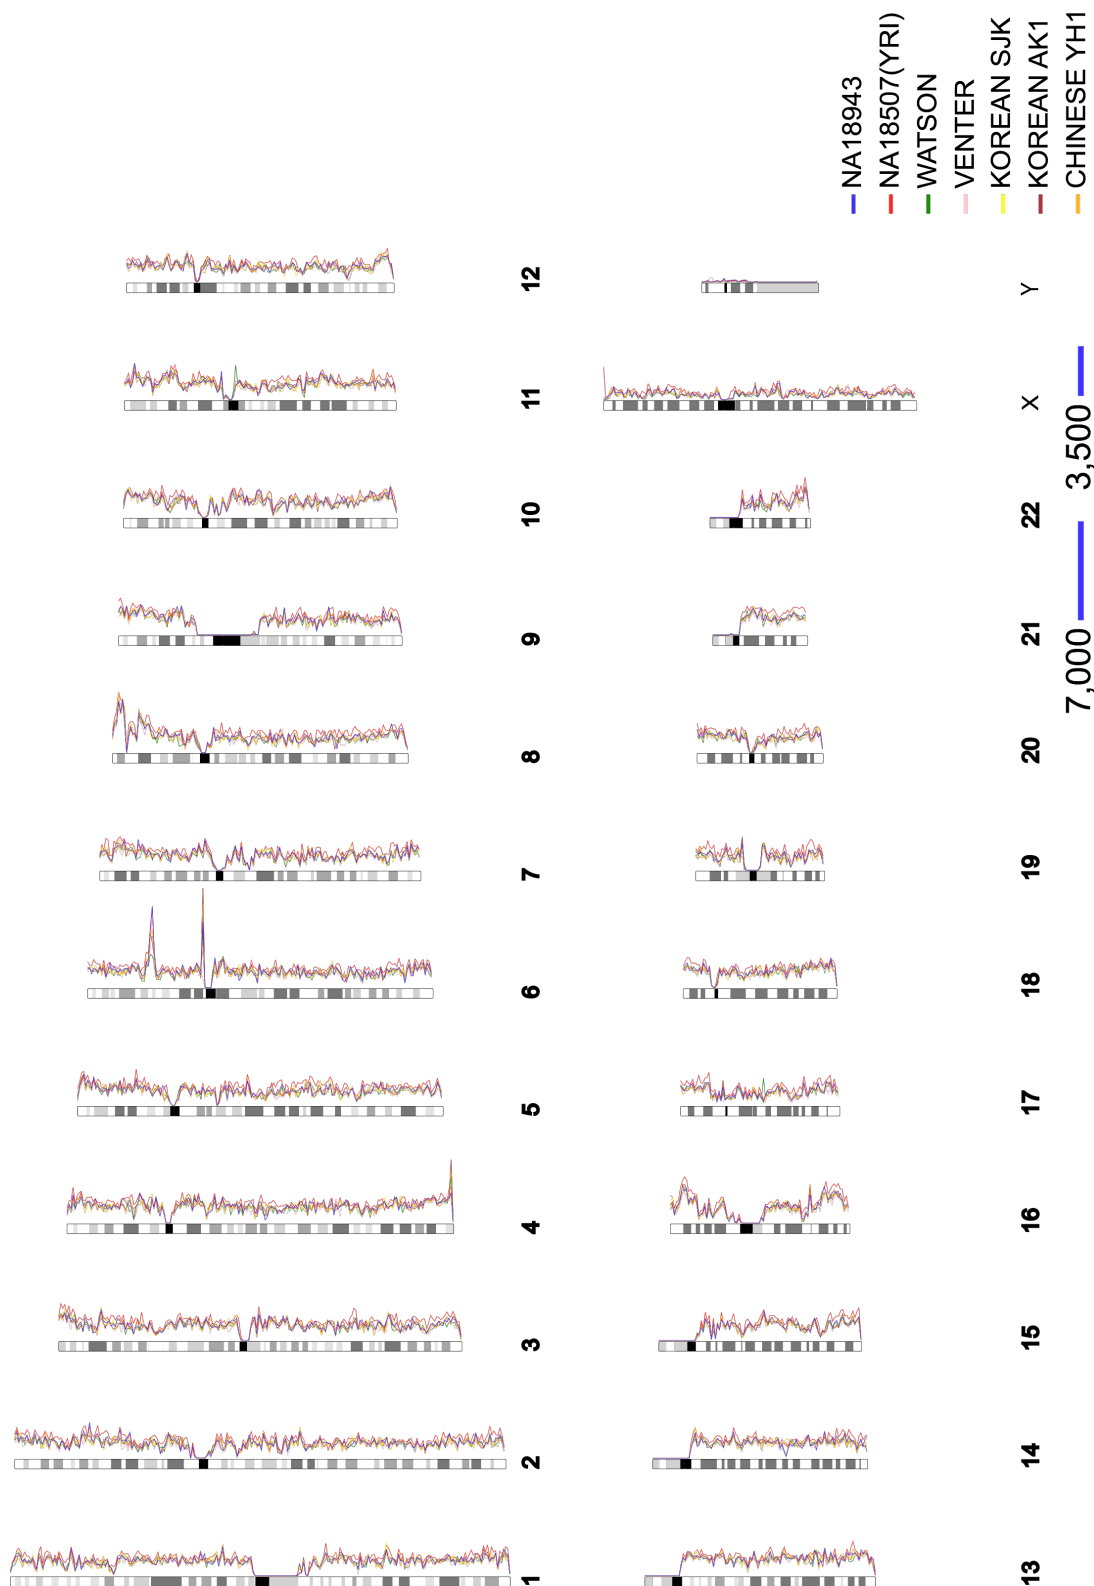

Supplementary Figure 14. **Distribution of number of SNVs within 1Mbp windows of seven individuals.** The vertical and horizontal axis represents position on each

chromosome and the number of SNVs within 1Mbp windows, respectively. NA18943 (blue), NA18507 (pink), Watson (green), Venter (pink), SJK (yellow), AK1 (violet), and YH1 (orange). Scale bars at the bottom indicate the number of SNVs.

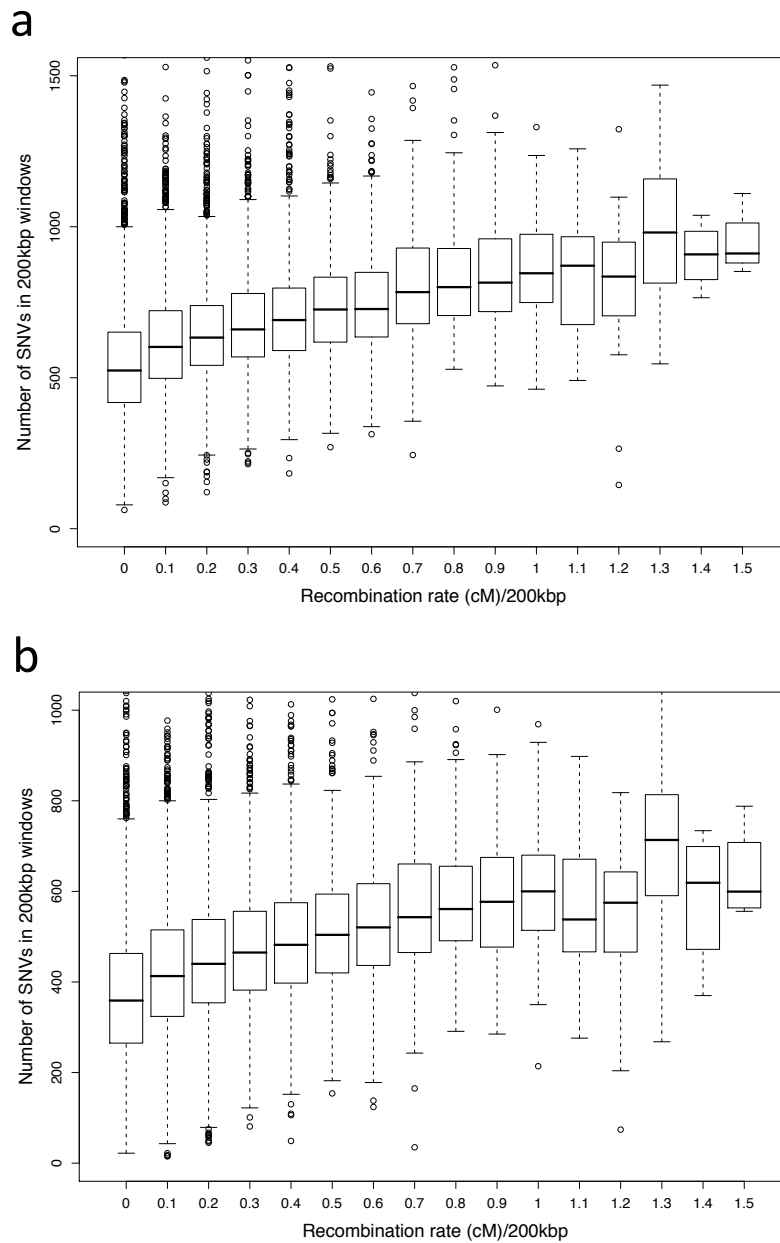

Supplementary Figure 15. **Relationship between recombination rate and SNV density within 200kbp.** (a) Seven individuals (NA18507, Watson, Venter, SJK, AK1, YH1 and NA18943). Significant correlation was observed ( $P$ -value  $< 1.0 \times 10^{-16}$ ). (b) Four Asians (SJK, AK1, YH1 and NA18943). Significant correlation was observed ( $P$ -value  $< 1.0 \times 10^{-16}$ ).

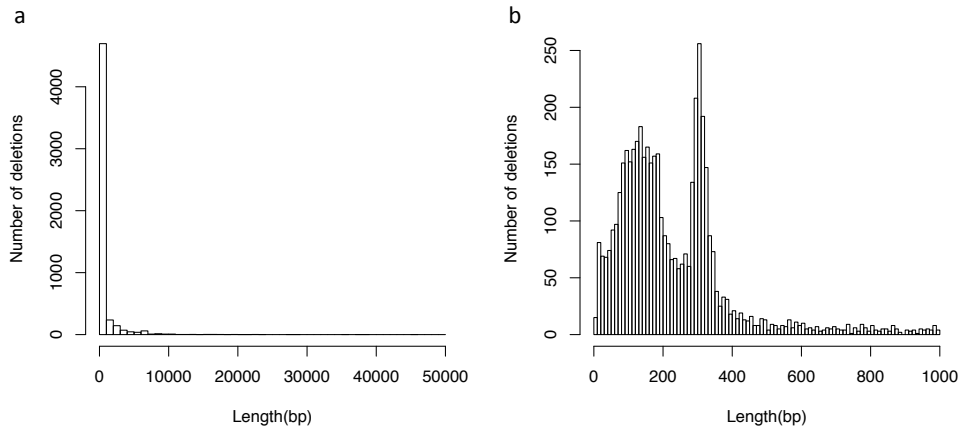

Supplementary Figure 16. **Length distribution of deletions.** (a) Length distribution of all deletions. (b) Length distribution of deletions with the length  $\leq 1$  kbp.

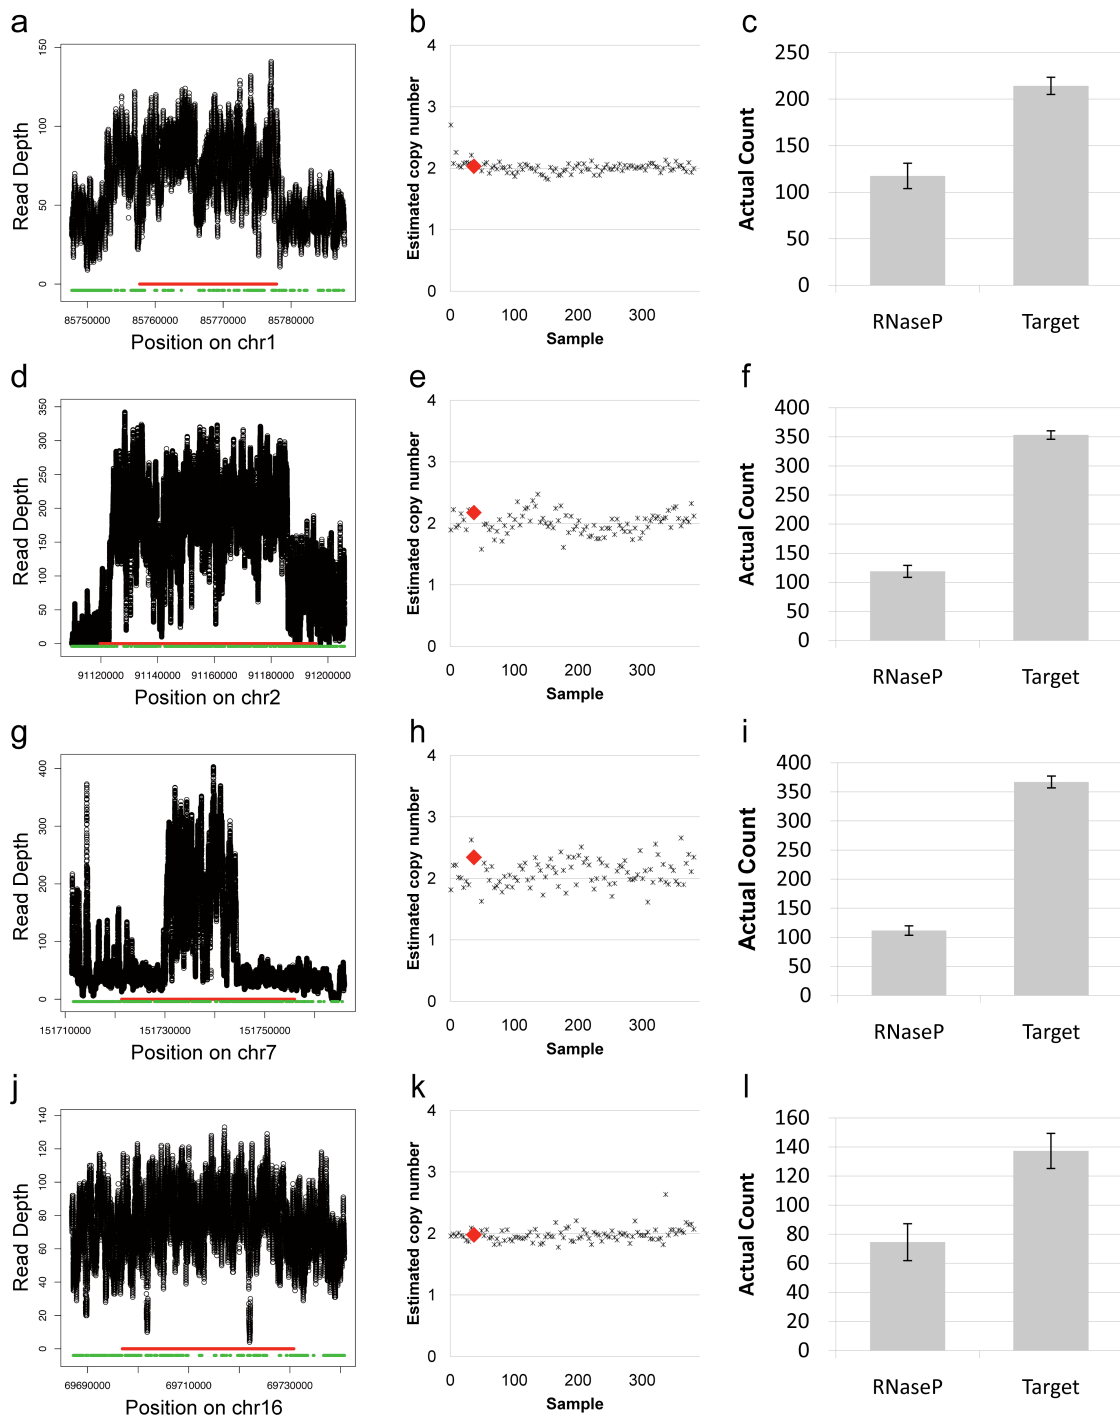

Supplementary Figure 17. **Digital PCR validation of the candidate copy number gain.** (a)-(c) Candidate region on chr1:85,757,716-85,777,862. Average read depth; 77.4. Estimated copy number by digital PCR;  $4.3 \pm 0.4$  (d)-(f) Candidate region on chr2:91,119,738-91,195,844. Average read depth; 161.6. Estimated copy number by digital PCR;  $13.9 \pm 2.7$ . (g)-(i) Candidate region on chr7:151,721,324-151,755,980.

Average read depth; 146.7. Estimated copy number by digital PCR;  $19.1 \pm 4.4$ . (j)-(l) Candidate region on chr16:69,711,614-69,730,788. Average read depth; 76.0. Estimated copy number by digital PCR;  $4.2 \pm 0.5$ . (a), (d), (g), and (j) Read depth of the target region. Red bar; candidate region. Green bar; repeat masker suggested repeat region. (b), (e), (h), and (k) Comparison of copy number of NA18943 and HapMap samples by TaqMan. Red diamond represents NA18943. (c), (f), (i), and (l) Result of Digital PCR. In the all candidate regions, the TaqMan assay did not detect copy number differences among samples, however, digital PCR assay revealed that the candidates have increased copy number as the average read depth suggested.

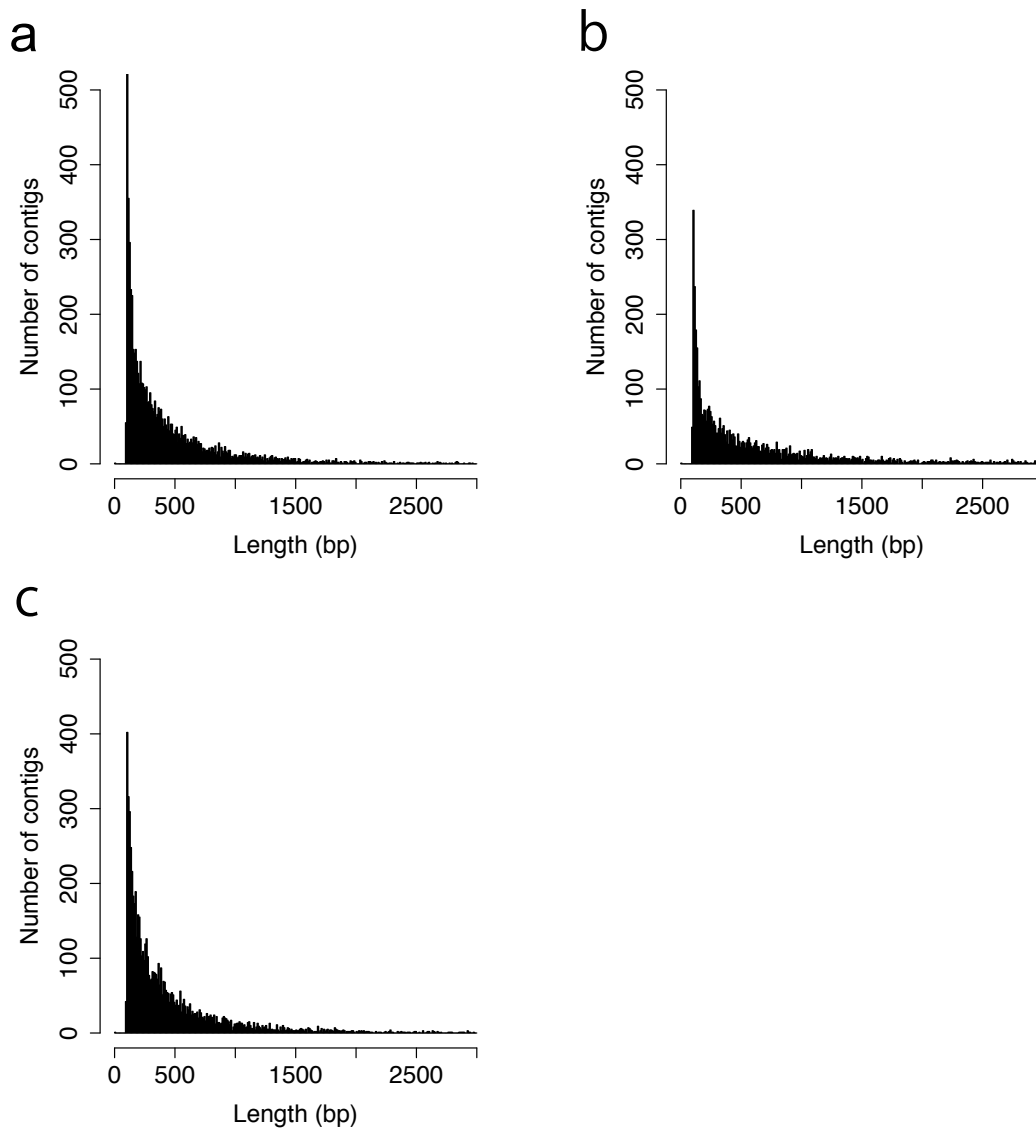

Supplementary Figure 18. **Distribution of the contig length generated by *de novo* assembly software.** (a)ABySS. (b)SOAPdenovo. (c)Velvet. The numbers of contigs with the length between 100bp and 3kbp are shown.



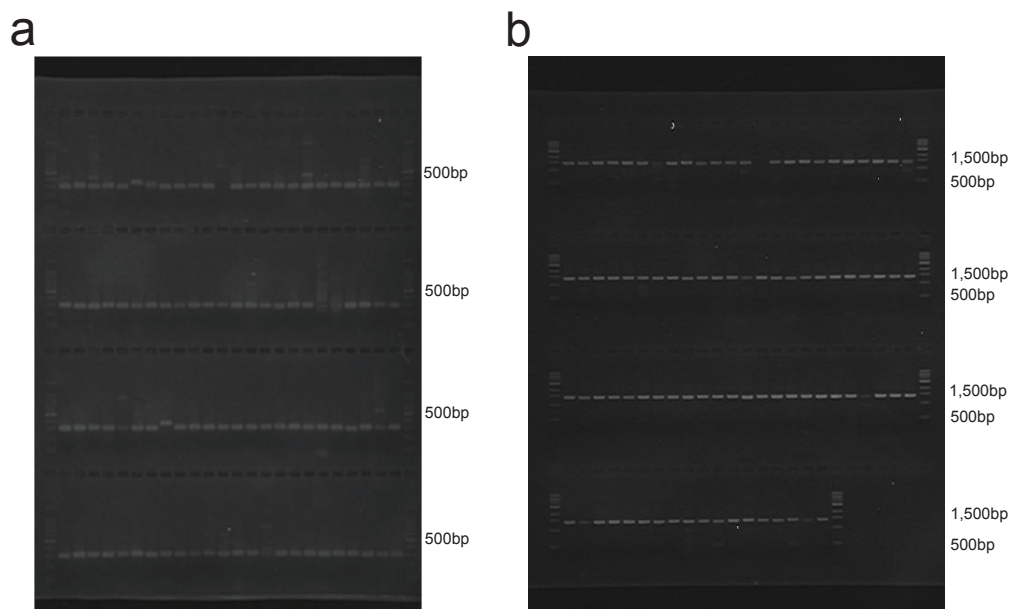

Supplementary Figure 19. **PCR validation of *de novo* contigs.** (a) PCR validations of the contigs with the length between 500bp and 1,000bp. PCR primers were designed to amplify 300-350bp fragments. Marker; 100bp ladder. (b) PCR validations of the contigs with the length more than 1,000bp. PCR primers were designed to amplify 1,300-1,450bp fragments. Marker length; 0.5, 1, 1.5, 2, 4, 5, 6, 8, and 10kbp.

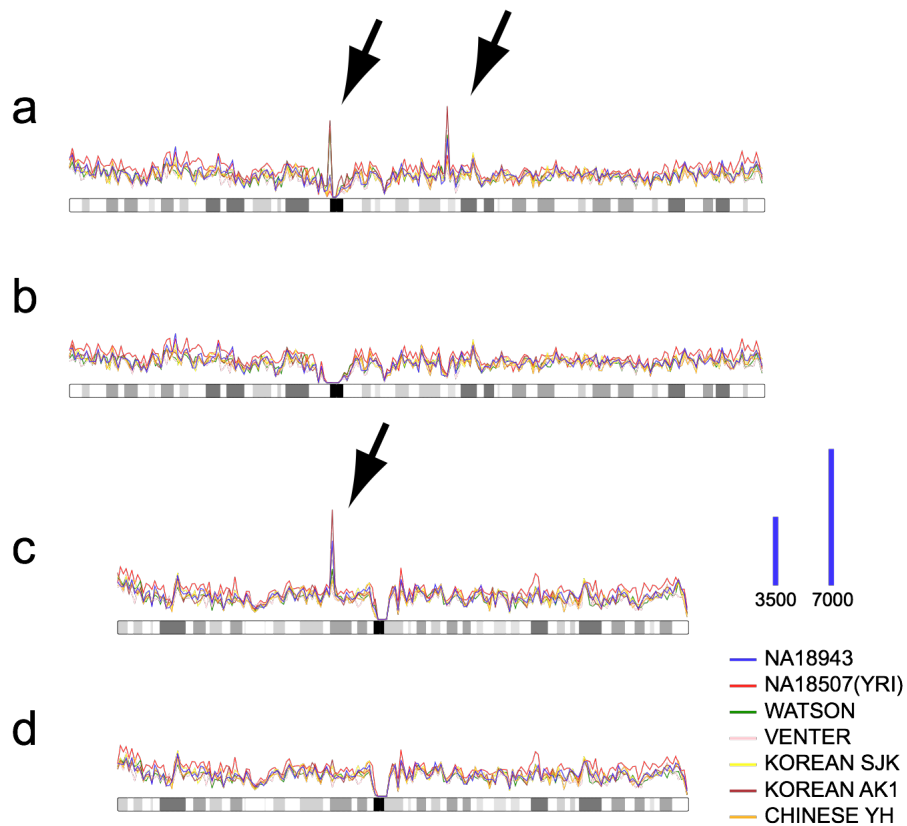

Supplementary Figure 20. **Distribution of the number of SNVs within 1Mbp windows of seven individuals.** (a) Distribution of number of SNVs on chr2. (b) Distribution of number of SNVs on chr2 after excluding SNVs in short repeat regions. Peaks that are indicated by the arrows are absent. (c) Distribution of number of SNVs on chr3. (d) Distribution of number of SNVs on chr3 after excluding SNVs in short repeat regions. Peak that is indicated by the arrow is absent. NA18507 (pink), Watson (green), Venter (pink), SJK (yellow), AK1 (violet), YH (orange) and NA18943 (blue) are shown. Scale bars indicate the number of SNVs.

a

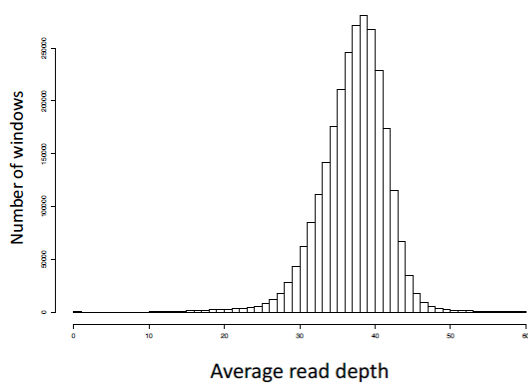

b

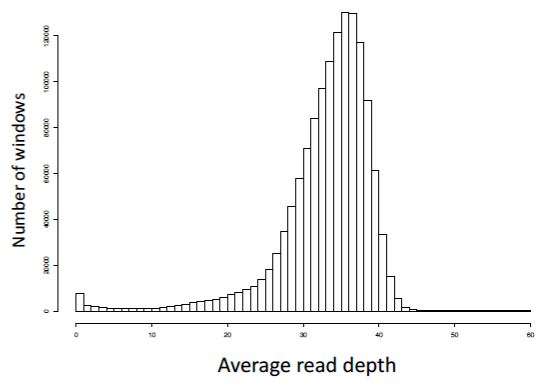

Supplementary Figure 21. **Distributions of average read depth in 5kbp windows. (a)** No read selection, **(b)** Read selection by mapping quality  $\geq 1$ .

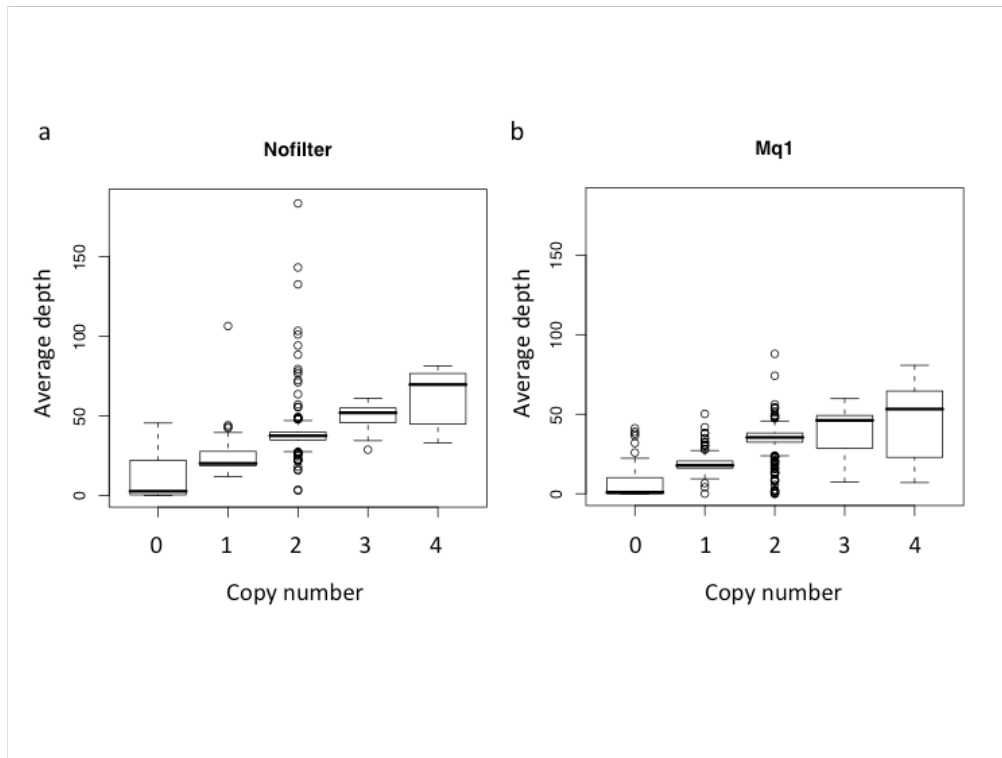

Supplementary Figure 22. **Copy number in McCarroll *et al* (2008) copy number polymorphism (CNP) region<sup>1</sup> vs. average read depth in each region. (a)** Average read depth was calculated using no read selection. Correlation coefficient = 0.54 ( $P$ -value <  $2.2 \times 10^{-16}$ ). **(b)** Average read depth was calculated from reads with a mapping quality  $\geq 1$ . Correlation coefficient = 0.58 ( $P$ -value <  $2.2 \times 10^{-16}$ ).

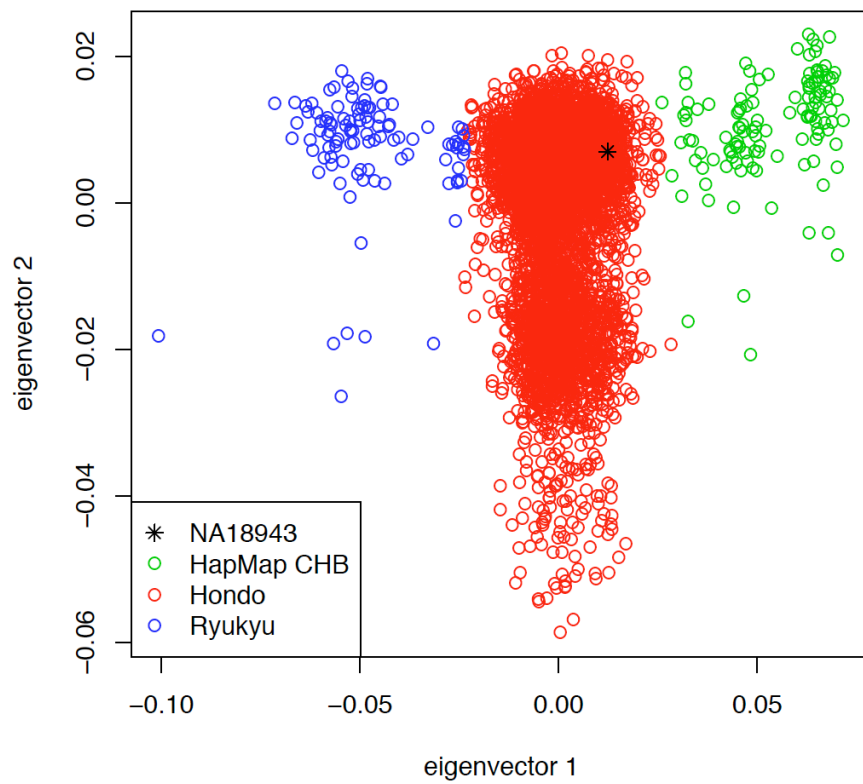

Supplementary Figure 23. **Analysis of the first two principal components.** Genetic relatedness of NA18943 to Japanese and Han Chinese populations were examined.

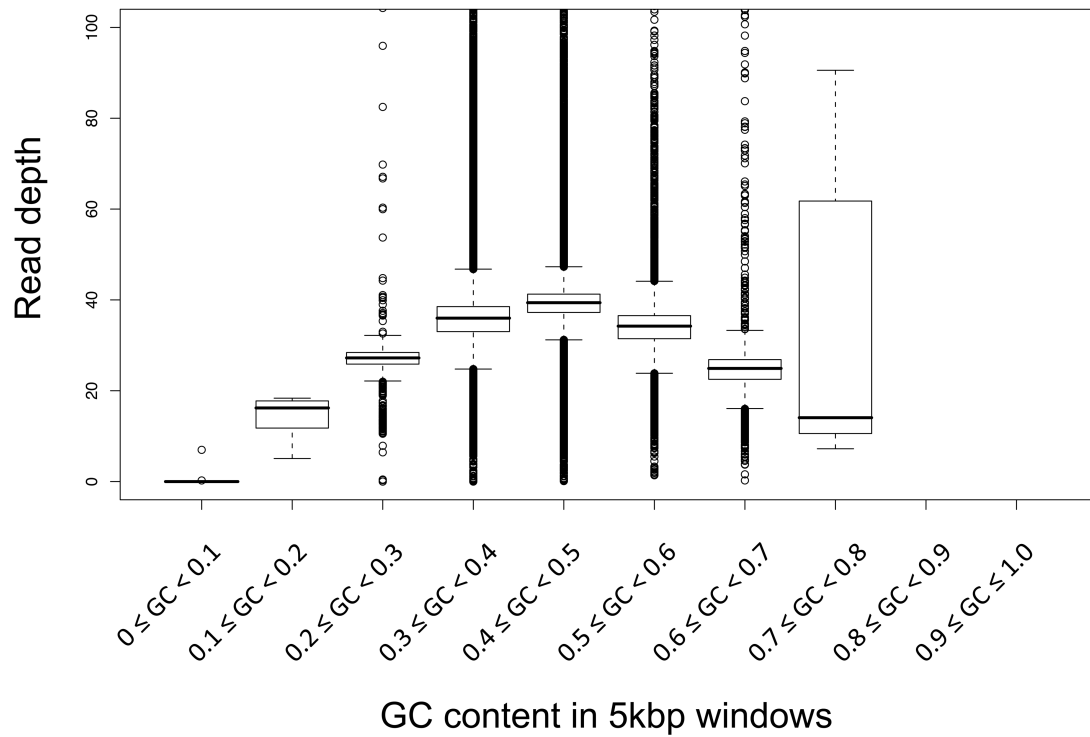

Supplementary Figure 24. **Relationship between GC content and average read depth.** GC content and read depth were calculated in 5kbp windows.

### Reference

1. McCarroll, S.A. et al. Integrated detection and population-genetic analysis of SNPs and copy number variation. *Nat Genet* **40**, 1166-1174 (2008).

| Genome                | Mapped           | Uniquely mapped (mq <sup>a</sup> ≥30) | Unmapped         |
|-----------------------|------------------|---------------------------------------|------------------|
| Alternative Genomes   | 32978489 (40.7%) | 11995047 (14.8%)                      | 47859383 (59.2%) |
| AK1                   | 11667556 (14.4%) | 978468 (1.2%)                         | 69170316 (85.6%) |
| YH1                   | 10473366 (13.0%) | 961400 (1.2%)                         | 70364506 (87.0%) |
| hs_alt_Celera         | 20485946 (25.3%) | 6737368 (8.3%)                        | 60351926 (74.7%) |
| hs_alt_HuRef          | 22220929 (27.5%) | 7253278 (9.0%)                        | 58616943 (72.5%) |
| YH1(de novo assembly) | 2870585 (3.5%)   | 198826 (2.5%)                         | 77967287 (96.5%) |

a; bwa mapping quality

Supplementary Table 6: Result of breakpoint detection

| chr | position1 <sup>a</sup> | position2 <sup>b</sup> | type | mapping distance (kbp) | blast result              |
|-----|------------------------|------------------------|------|------------------------|---------------------------|
| 1   | 166779146              | 166814813              | RR   | 35.74                  | Short repeat <sup>c</sup> |
| 2   | 116694691              | 116698674              | FF   | 4.06                   | Partial hit               |
| 3   | 80147837               | 80147167               | RR   | 0.75                   | Breakopint                |
| 7   | 6204376                | 6204366                | RF   | 0.06                   | Breakopint                |
| 7   | 149331264              | 153421572              | RR   | 4090.38                | Short repeat <sup>c</sup> |
| 9   | 44333060               | 44194886               | RR   | 138.22                 | Multiple hit              |
| 10  | 127187116              | 127180581              | FF   | 6.61                   | Breakopint                |
| 10  | 127503337              | 127503640              | RF   | 0.38                   | Breakopint                |
| 12  | 11450302               | 11411283               | RF   | 39.07                  | Multiple hit              |
| 14  | 18082688               | 18077867               | RF   | 4.89                   | No hit                    |

a; Mapping position of a read of an anomalous pair

b; Mapping position of alternative read of an anomalous pair

c; Not sequenced due to short tandem repeat



Supplementary Table 7: Result of *de novo* assembly

| Assembler  | Kmer | Contigs | n50 (bp) | Maximum Length (bp) | Total Length (bp) | Scaffolds | Reads Used |
|------------|------|---------|----------|---------------------|-------------------|-----------|------------|
| ABYSS      | 25   | 17603   | 592      | 61196               | 3752402           | 821       | 2636407    |
| SOAPdenovo | 25   | 4826    | 1339     | 10374               | 3411209           | 1735      | 1276020    |
| Velvet     | 25   | 8741    | 687      | 25072               | 3251121           | 10        | 2303705    |

Supplementary Table 8: Result of blast analysis of novel contigs

| Category          | ABySS             |             | SOAPdenovo        |             | Velvet            |             |
|-------------------|-------------------|-------------|-------------------|-------------|-------------------|-------------|
|                   | Number of Contigs | Length (bp) | Number of Contigs | Length (bp) | Number of Contigs | Length (bp) |
| Total             | 6535              | 3121855     | 4826              | 3411209     | 6617              | 3098957     |
| Hs build36.3      | 0                 | 0           | 6                 | 4103        | 21                | 9728        |
| Hs GRCh37         | 1294              | 579885      | 816               | 607696      | 1333              | 572149      |
| Hs Alt            | 4613              | 2248301     | 3321              | 2573851     | 4515              | 2207731     |
| Hs Other          | 353               | 192890      | 313               | 109129      | 461               | 195210      |
| Chimpanzee        | 152               | 40727       | 147               | 46673       | 126               | 35622       |
| Orangutan         | 25                | 6889        | 25                | 7548        | 27                | 7318        |
| Rhesus Macaque    | 32                | 12190       | 18                | 9182        | 34                | 9857        |
| Marmoset          | 5                 | 3190        | 5                 | 4108        | 6                 | 2233        |
| Herpesvirus 4     | 7                 | 29528       | 86                | 34801       | 27                | 47727       |
| <i>Bos taurus</i> | 8                 | 1282        | 16                | 3035        | 7                 | 1107        |
| Remaining         | 46                | 6973        | 73                | 11083       | 60                | 10275       |

Hs build36.3; Human genome build 36. Hs GRCh37; Human genome GRCh37. Hs Alt; Human genome alternative assemblies.  
Hs Other; Other humna genome sequences in the NCBI database. Herpesvirus 4; Human herpesvirus 4.
